# Supplementary material
Source: Elsevier journal article supplement (https://www.sciencedirect.com/science/article/pii/S2341287922000138)
Supplement: mmc1 [file S2341287922000138:mmc1.docx]

**ANEXO 1. GRUPO DE REANIMACIÓN NEONATAL DE LA SOCIEDAD ESPAÑOLA DE NEONATOLOGÍA (GRN-SENEO)**

Enrique Salguero García; Servicio de Neonatología Hospital Regional Universitario de Málaga, España.

Miguel Sánchez Mateos; Hospital Universitario Puerta de Hierro de Mahadahonda, Madrid, España.

Asunción Pino Vázquez; Hospital Clínico Universitario de Valladolid, Spain.

Elena García Victori; Servicio de Neonatología Hospital Universitario Virgen del Rocío, Sevilla, España.

Eva González Colmenero; Hospital Álvaro Cunqueiro de la Estructura Organizada de Xestión Integrada de Vigo, España.

Dolores Elorza Fernández; Servicio de Neonatología Hospital Universitario La Paz de Madrid, España.

Josefa Aguayo Maldonado; Servicio de Neonatología Hospital Universitario Virgen del Rocío de Sevilla, España.

Máximo Vento; Servicio de Neonatología, Hospital Universitario y Politécnico e Instituto de Investigación Sanitaria La Fe, Valencia, España.

Mata Thió Lluch; Newborn Research Centre & Neonatal Services, The Royal Women’s Hospital Melbourne, Melbourne, Australia.
